# Supplementary material
Source: PubMed Central journal article supplement (PMC3982198)
Supplement: NIHMS564415-supplement-1.pdf [file NIHMS564415-supplement-1.pdf]

Supplemental Figure 1.

| Sites | Strand | Sequences                                           |
|-------|--------|-----------------------------------------------------|
| 1     | +      | ATACAACTGA CCTCTAGGGGGCTCTGGAGCT AAATCTACAG         |
| 2     | +      | GTTGTTTGTA CCACAAGAGGGCGCTCTAGGC CGGTTTATTA         |
| 3     | +      | TCGTGAGCAG CCTCTTAGGGGCGCTGTTTCC CAAACTCTGG         |
| 4     | +      | CAATAAATCC CCACCAGGGGGCGCTCGCGTG TGTAGCTCTA         |
| 5     | +      | GCCCGACCTT CCACCAGGGGGCGGAGGTCTC CAGAGAGGCC         |
| 6     | -      | GGAGCAATGG CCCAGAGGTGGC CCGCGTGC TTGCTGTGCA         |
| 7     | -      | TCCTCTCTAG CCTCCAGGGGGCACCAGGCAC AGCCATACAT         |
| 8     | -      | CAAGTTGTAG CCTGTAGGTGTCAGCAAAGAC TGACAATGGG         |
| 9     | +      | ACACATTTGT CCACTAGGTGGCGCCAAAGAC ATGTGCTCTC         |
| 10    | +      | CACCTACAGG CCAGAAGTGGCCACCATATCC CAGTATAGAT         |
| 11    | -      | TTTTACATGG CCACCAGATGGCACCAGACTC ACACTGCGCG         |
| 12    | +      | TGCTGTGTTA ACACTAGAGGGCGACTTTGAG CTTAGAAATC         |
| 13    | -      | AGGCCCTGAC CCCCTAGGGGGCACTCGTTCT CAGGAGAGCC         |
| 14    | -      | CAAACTGTA CCAGCAGGGGGCAGCGTGCAG TCCTCAGCAA          |
| 15    | +      | CCTACAGAAC TCAGTAGAGGGCATCAGATCC CTGGAACTGG         |
| 16    | -      | CAGTGGACAA ACAGCAGATGGCAGTGCTGAG CGAGGATCCT         |
| 17    | -      | CCACGAATGA <u>C CAGTAGATGGCGGAATTGAC</u> AAGACAAGAT |

Core sequences

Supplemental Figure 1 – Alignment of CTCF sequences. The identified consensus sequence of CTCF binding sites from B cells and plasmablasts were aligned using MEME software (<http://meme.nbcr.net/meme/>). Core CTCF sequences are underlined in the middle of the sequences. A dash (-) indicates sequences in which the reverse complement of the sequence was used for the alignment.

**Supplemental Figure 2**  
**MHC-II Restriction Map and Location of 3C primers in the murine MHC-II locus**

*EcoR1* restriction sites

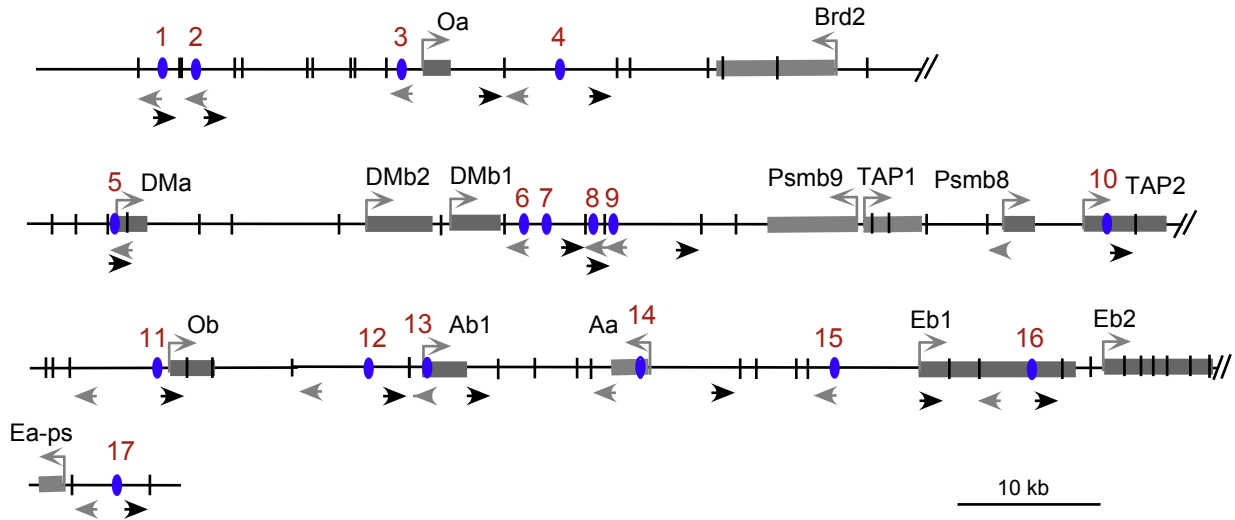

*BglII* restriction sites

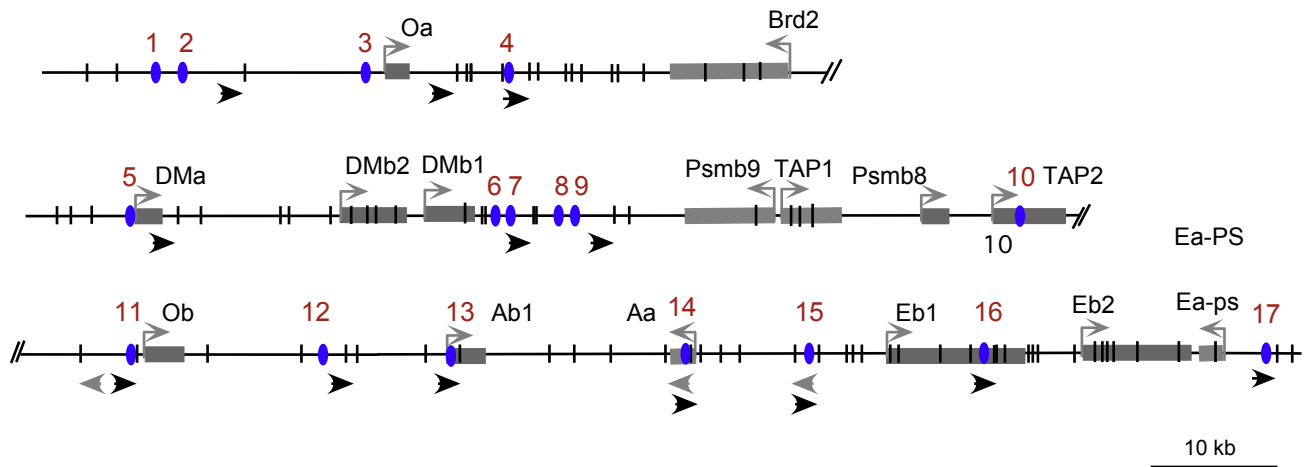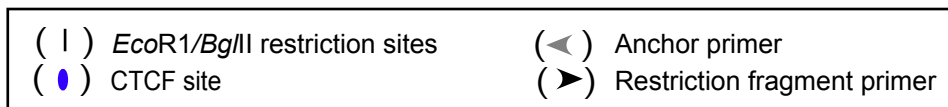

Supplemental Figure 2 – MHC-II locus restriction maps and 3C primer and 3C anchor positions. *EcoRI* and *BglIII* restriction maps of the C57Bl/6 MHC-II locus are shown with the gene bodies, transcription start sites, and CTCF-binding sites identified in this study. 3C anchor primers used in this study are illustrated by gray arrowheads. 3C primers used are represented by black arrowheads.

**Supplemental Table 1:** ENCODE Data used in this study.

| <b>Tissue</b>   | <b>ENCODE<br/>Accession</b> | <b>Contributing<br/>Lab</b> | <b>Contributing<br/>Institution</b> | <b># of Peaks</b> |
|-----------------|-----------------------------|-----------------------------|-------------------------------------|-------------------|
| Bone Marrow     | wgEncodeEM001687            | Ren, Bing                   | LICR                                | 15,611            |
| Cerebellum      | wgEncodeEM001689            | Ren, Bing                   | LICR                                | 23,680            |
| Cortex          | wgEncodeEM001690            | Ren, Bing                   | LICR                                | 37,080            |
| Heart           | wgEncodeEM001684            | Ren, Bing                   | LICR                                | 33,172            |
| Kidney          | wgEncodeEM001685            | Ren, Bing                   | LICR                                | 41,698            |
| Limb            | wgEncodeEM002589            | Ren, Bing                   | LICR                                | 31,566            |
| Liver           | wgEncodeEM001696            | Ren, Bing                   | LICR                                | 30,378            |
| Lung            | wgEncodeEM001697            | Ren, Bing                   | LICR                                | 24,582            |
| Olfactory Bulb  | wgEncodeEM002585            | Ren, Bing                   | LICR                                | 14,512            |
| Small Intestine | wgEncodeEM002591            | Ren, Bing                   | LICR                                | 17,170            |
| Testis          | wgEncodeEM002593            | Ren, Bing                   | LICR                                | 20,968            |
| Thymus          | wgEncodeEM002587            | Ren, Bing                   | LICR                                | 53,124            |
| Whole Brain     | wgEncodeEM002595            | Ren, Bing                   | LICR                                | 42,042            |

## Supplemental table-2 – Oligonucleotide sequences used in this study

### RT-PCR primers

| Primer        | Forward Primer            | Reverse Primer           |
|---------------|---------------------------|--------------------------|
| <i>H2-Aa</i>  | AGCCCAACACCCTCATCTGC      | ACCGTCTGCGACTGACTTGC     |
| <i>H2-Ab1</i> | GAGATCCTGGAGCGAACG        | AGGGAGATGACGACATTGG      |
| <i>H2-Eb1</i> | GCGGAGAGTTGAGCCTACG       | ACCATCTGACTTCAATGTTGCC   |
| <i>H2-Eb2</i> | ACACAGCCTCTGGAACACCATAACC | CAGTCTTCTCCTCCTCGCCATTCC |
| <i>RFX5</i>   | CTCGGGATGAACTGGTAGAAG     | CTGGACGATGGAAGTGAAGG     |
| <i>mCIITA</i> | GATCCTTCCAGCCTTCTCTTC     | CCTTGTCTCCGATCTTGTCTC    |
| <i>hCIITA</i> | GTGGCGAAATCAAGGACAAG      | CAGTTGTATAGGGCCTCTTC     |
| <i>CTCF</i>   | GAAGTCATGGAGGGTACAGTG     | GTCACAGGAACAGGTACTTGG    |
| <i>18S</i>    | GTAACCCGTTGAACCCCAT       | CCATCCAATCGGTAGTAGCG     |

### ChIP primers

|     | Forward                                | Reverse                            |
|-----|----------------------------------------|------------------------------------|
| C1  | CTCCTTCTGAATTGTGATTTATGAATTA<br>AGATGG | CGTGTGTATATCTCGCAGTATGTTCT<br>AAGG |
| C2  | ATCAGGCAAGCGAATCCGAAG                  | AAGCCTCCCTCGCCAAGC                 |
| C3  | AGAGCAGCGTGGGATTTTAAGG                 | CAGCCAGTCTAGCCAAACAGG              |
| C4  | TGAACTTGACACAGCATAGAATC                | GCCTCACAGCTCTCATATACAG             |
| C5  | GCAGGGTGAAGTTGATTCC                    | CCTCATGGCTCTCAGACC                 |
| C6  | GGGATGCCTGCCTGGTTC                     | TCACTGAGACTGGAGCAATGG              |
| C7  | GTATGAGTGTGGCTGCCTGAATGC               | GCTCACAACCATCTCTAACTCCAGTTC<br>C   |
| C8  | CAGACAGACAGACAGACAGAC                  | TGACAATGGGCAGGAAACC                |
| C9  | GCTCTCCACACTTCCAAACC                   | TAATTGTGTCAGGCTGAGTCG              |
| C10 | ATGCGACTGGACAGGAAC                     | TGGCTCACCGTCATCTATAC               |
| C11 | GTAGGGAAGGCTGTCTTTGC                   | TGAGGCTCAATGCTGTTCTC               |
| C12 | ACAGTCTTCAAGGTTCTCATCC                 | TGCTCTGGTCCCTTAGTCTGG              |
| C13 | AGCAGGCAGTTCTCAGAGG                    | GGGGCACTCGTTCTCAGG                 |
| C14 | CCACACCTCTCCATCAAAGC                   | GCAGTCCTCAGCAACACC                 |
| C15 | CCCTTCCGTTCTCCTTCC                     | CTCACAGCCATCTGAAACC                |
| C16 | CGGAAATAACCAAAGAAAATGAAGG              | ACAAGTCATAACAGCCATTAC              |
| C17 | AGCATCTTGTCTTGTCAATTCCG                | CCCAGCCTTTGTATCCTTGAACC            |
| N1  | GTTCCCTTTCCTTGCTCTCTC                  | CATCCAACACAACACTGACTTTCC           |

### Quantitative 3C Primer Sets (CTCF/ CTCF)

| Primer | Anchor Primer             | Restriction Fragment Primer  |
|--------|---------------------------|------------------------------|
| C1     | TCTTCATGTTGATAATCCGCATCC  | AAGGAGCGATTATGGAGTTGG        |
| C2     | ACAGGGATTCAGTACATCTC      | AAAGATTGTTCTAAAGTAGTTACC     |
| C3     | CTGGAACACTACTCTGTAGACC    | GCGTATTAGCCAGGGTTC           |
| C4     | ATGGAGGGATGTAAGAACGG      | CCAGGGCTATACAGAGAAACC        |
| C5     | AGAAAACAAGAAAGTGTCCCTTAGG | TAGCCTAGTGTCTCTTTCCC         |
| C6.7   | GGGCTCACGGGATTCTGG        | TGACCTTGAACCAATGTAGCC        |
| C8     | TATAACATGATCCCCAATACACC   | GCCATCTACTTATATTAGTTTCCAG    |
| C9     | ACACCCAGTCTCCAGCATTTAC    | AATATAAGGAGAAACAATCTGAGCAC   |
| C10    | AGCAGTAAAGAGAAATGAGAGC    | CTGCTGCTTTTCACTCTCTCC        |
| C11    | GTTCCCATATCTTTGAGG        | CATCTGGTGGCCATGTAAA          |
| C12    | GTGTGCTGTGGGTGTTTATTGG    | ATGAATGAAGCCTGAATTATGTCAAATG |
| C13    | GCTGAGCCTCTTTCCAATCC      | TCTCCCTCCTTACACTGCTTCC       |

|     |                              |                              |
|-----|------------------------------|------------------------------|
| C14 | TTCTTTCTCTTCTTCAAGTGACC      | TGTGTA CTGGAGCTTATTCTGACC    |
| C15 | AACAAAGGAAAGAGAAGATATTTATAGC | CCTGGAGACACGCCCTTACC         |
| C16 | TGAGGAGATCAGCAGTTAATGG       | TGAAGTAACAAGGCTGAAGGAAGG     |
| C17 | CCTGCCTCTCCTCCCTATCC         | CTTTAAGGGACTTCAAGTGGTAAATCTC |

### Quantitative 3C Primer Sets (promoters/ CTCF)

| Primer | Restriction Fragment Primer | Anchor Primer (Ab1)         |
|--------|-----------------------------|-----------------------------|
| Ab1    | GTGGTCGGTTAGGCATCATATTC     | AGCATTCCAGGGTCCACAC         |
| C2     | TGAAACTCTCGATGCAGACC        | AGCATTCCAGGGTCCACAC         |
| C3     | TCGTGTGTCTCCTCCAGAAC        | AGCATTCCAGGGTCCACAC         |
| C4     | AAGATATTTTCTATGCTTTTGGTATGG | AGCATTCCAGGGTCCACAC         |
| C5     | AGGTAGGTGTGCCGATCC          | AGCATTCCAGGGTCCACAC         |
| C6.7   | GCCAAATCCCATTATTAGATCC      | AGCATTCCAGGGTCCACAC         |
| C9     | AAGGAGGACCACCGATCATC        | AGCATTCCAGGGTCCACAC         |
| C11    | GCAACCACATGGTGGCACAC        | AGCATTCCAGGGTCCACAC         |
| C12    | GAGAAAGGGCTGAAAAGATGG       | AGCATTCCAGGGTCCACAC         |
| C13    | GTGGTCGGTTAGGCATCATATTC     | AGCATTCCAGGGTCCACAC         |
| C14    | TTCTAACAGCAGACCTCTACTCG     | AGCATTCCAGGGTCCACAC         |
| C15    | GACGCCGAGA ACTGGAAC         | AGCATTCCAGGGTCCACAC         |
| C16    | TCAGGGTGGTCATGTTTAAGG       | AGCATTCCAGGGTCCACAC         |
| C17    | CTGGAAGTCACCTGGAAAGC        | AGCATTCCAGGGTCCACAC         |
| Primer |                             | (Aa)                        |
| Aa     | TCTGAGGAACATATAACTGAAGGG    | TAAGTGAAGGGCTACATGAAAATATCC |
| C2     | TGAAACTCTCGATGCAGACC        | CTGCTCTTGCTGAGGACAC         |
| C3     | TCGTGTGTCTCCTCCAGAAC        | CTGCTCTTGCTGAGGACAC         |
| C4     | AAGATATTTTCTATGCTTTTGGTATGG | CTGCTCTTGCTGAGGACAC         |
| C5     | AGGTAGGTGTGCCGATCC          | CTGCTCTTGCTGAGGACAC         |
| C6.7   | GCCAAATCCCATTATTAGATCC      | CTGCTCTTGCTGAGGACAC         |
| C9     | AAGGAGGACCACCGATCATC        | CTGCTCTTGCTGAGGACAC         |
| C11    | GCAACCACATGGTGGCACAC        | CTGCTCTTGCTGAGGACAC         |
| C12    | GAGAAAGGGCTGAAAAGATGG       | CTGCTCTTGCTGAGGACAC         |
| C13    | GTGGTCGGTTAGGCATCATATTC     | CTGCTCTTGCTGAGGACAC         |
| C14    | TTCTAACAGCAGACCTCTACTCG     | CTGCTCTTGCTGAGGACAC         |
| C15    | GACGCCGAGA ACTGGAAC         | CTGCTCTTGCTGAGGACAC         |
| C16    | TCAGGGTGGTCATGTTTAAGG       | CTGCTCTTGCTGAGGACAC         |
| C17    | CTGGAAGTCACCTGGAAAGC        | CTGCTCTTGCTGAGGACAC         |
| Primer |                             | (Eb1)                       |
| Eb1    | GAAGCCTGGATGTTTGTGC         | GGAGTGTGGAGAGCATGG          |
| C2     | TGAAACTCTCGATGCAGACC        | TTAGCACACAGGCTGAGG          |
| C3     | TCGTGTGTCTCCTCCAGAAC        | TTCATCTATCTTTTAGCACACAGG    |
| C4     | AAGATATTTTCTATGCTTTTGGTATGG | GCACAACAGGCTGAGGTC          |
| C5     | AGGTAGGTGTGCCGATCC          | CACAACAGGCTGAGGTCAG         |
| C6.7   | GCCAAATCCCATTATTAGATCC      | GGAGTGTGGAGAGCATGG          |
| C9     | AAGGAGGACCACCGATCATC        | TTCATCTATCTTTTAGCACACAGG    |
| C11    | GCAACCACATGGTGGCACAC        | GCACAACAGGCTGAGGTC          |
| C12    | GAGAAAGGGCTGAAAAGATGG       | GCACAACAGGCTGAGGTC          |
| C13    | GTGGTCGGTTAGGCATCATATTC     | GTGGAGAGCATGGCAGAGC         |
| C14    | TTCTAACAGCAGACCTCTACTCG     | TCAGCAAGAGCAGCCAGTG         |
| C15    | GACGCCGAGA ACTGGAAC         | GCACAACAGGCTGAGGTC          |
| C16    | TCAGGGTGGTCATGTTTAAGG       | GCACAACAGGCTGAGGTC          |
| C17    | CTGGAAGTCACCTGGAAAGC        | GCACAACAGGCTGAGGTC          |
